# Supplementary material
Source: PubMed Central journal article supplement (PMC4086361)

A

|          |                                                                                                                                |      |      |      |      |      |      |      |      |      |      |      |      |
|----------|--------------------------------------------------------------------------------------------------------------------------------|------|------|------|------|------|------|------|------|------|------|------|------|
|          | 10                                                                                                                             | 20   | 30   | 40   | 50   | 60   | 70   | 80   | 90   | 100  | 110  | 120  |      |
| Helitron | MPRLRSASQSQSRKLRNRSNR--DRNLNGLNLEIFIEIENRELVIDAHPFVPEVRNQELTEGPNQETAMQVSGVQGEQAQVPGXVNEAAGSDGNAQNKQVSVRQSVRLRNQHVENIEERV       |      |      |      |      |      |      |      |      |      |      |      |      |
| Muller-A | MPRLRSASQSQSRKLR-----\DRNLNLENVFEIENREXXXXXXXXXXXXXXXXXXXXXXXXXXXXXXXXXXXXXXXXXXXXXXXXXXXXXXXXXXXXXXXXXXXXXXXXXXXX             |      |      |      |      |      |      |      |      |      |      |      |      |
|          | 130                                                                                                                            | 140  | 150  | 160  | 170  | 180  | 190  | 200  | 210  | 220  | 230  | 240  |      |
| Helitron | ELRTRGQGVANTERRFKRRRSQRYRATEQAQNTAEHVLRRDTSRIREEQVADTVRRSRRRQDSXYRAREQEQNTEHIVRRDQAIRHEEQVADTVRRSRRRQDPDYRTREQQNTVEHIVRRT      |      |      |      |      |      |      |      |      |      |      |      |      |
| Muller-A | XXXXXXXXQVANTVRRSRRRQDLDYRAREQEQNTVEHIVRRTDAQIRHEEQVANTVRRSRRRQDLDYRAREQEQNTVEHIVRRTDAQIRHEEQVANTVRRSRRRQDLDYRAREQEQNTVEHIVRRT |      |      |      |      |      |      |      |      |      |      |      |      |
|          | 250                                                                                                                            | 260  | 270  | 280  | 290  | 300  | 310  | 320  | 330  | 340  | 350  | 360  | 370  |
| Helitron | DARIRHEEQVADTVRRSRRRQDPDYRAREQEQNTVEHIVRRTDAQIRHEEQVADTVRRSRRRQDSDYRTREQERNTERRQVRLNERRRML--EREQDVRVRVQESLVDVRRRISRARDTLARQA   |      |      |      |      |      |      |      |      |      |      |      |      |
| Muller-A | DAQIRHEEQVANTVRRSRRRQDLDYRTREQEQNTVEHIVRRTDAQIRHEEQVANTVRRSRRRQDLDYRTREQERNTERRQVRLNERRRML/EREQDVRVRVQESLVDVRRRISRARDTLARQA    |      |      |      |      |      |      |      |      |      |      |      |      |
|          | 380                                                                                                                            | 390  | 400  | 410  | 420  | 430  | 440  | 450  | 460  | 470  | 480  | 490  |      |
| Helitron | ARAAARQLEIDAARTASQVRSYRSDDSNRVEQNLRNASRMQOERANISQEDRAQIEPRILRSGLEALKVVMNRNKLGPQVCLCKGLWFKQIQICKIPRVLLESDFSGEIFALESLEFFPS       |      |      |      |      |      |      |      |      |      |      |      |      |
| Muller-A | ARAAARQLEIDAARTASQVRSYRSDDSNRVEQNLRNASRMQOERANISQEDRAQIEPRILRSGLEALKVVMNRNKLGPQVCLCKGLWFKQIQICKIPRVLLESDFSGEIFALESLEFFPS       |      |      |      |      |      |      |      |      |      |      |      |      |
|          | 500                                                                                                                            | 510  | 520  | 530  | 540  | 550  | 560  | 570  | 580  | 590  | 600  | 610  | 620  |
| Helitron | DCPTLFCRTRCHSNIKKRIPKLPFFNELDFPMLPDLCKGLTPLEERLISPRLPFMIKIPILGGRGNAIKGAVNVNPIVSVDIVKELPRAFHAQVIQLHLKRRKEYLHAFMAETIRPSKIFEA     |      |      |      |      |      |      |      |      |      |      |      |      |
| Muller-A | DCPTLFCRTRCHSNLKKRIPKLPFFNELDFPMLPDLCKGLTPLEERLISPRLPFMIKIPILGGRGNAIKGAVNVNPIVSVDIVKELPRAFHAQVIQLHLKRRKEYLHAFMAETIRPSKIFEA     |      |      |      |      |      |      |      |      |      |      |      |      |
|          | 630                                                                                                                            | 640  | 650  | 660  | 670  | 680  | 690  | 700  | 710  | 720  | 730  | 740  |      |
| Helitron | LRYLVTDLTKHNNVVNEQISGFTSDIVPFAVQADAFLESMQNRDNDVTEPAHPDEVEAEELMPGGQTLLENNIPFDDRIKIAPGQGRPLDMLDIDSELSFPTIYAGVKRQSSQ              |      |      |      |      |      |      |      |      |      |      |      |      |
| Muller-A | LRYLVTDLTKHNNVVNXX-----                                                                                                        |      |      |      |      |      |      |      |      |      |      |      |      |
|          | 750                                                                                                                            | 760  | 770  | 780  | 790  | 800  | 810  | 820  | 830  | 840  | 850  | 860  | 870  |
| Helitron | SFTTIVRSELNRVDRRCRTDKLFFNYKKLELIRNINISICLKRKSTSSAVTAANLNFIFGLINHDGVRVLDIRSSPAHWEDEKKVMAMRFGOLFPTFFITLSAETRWPELLVLLKK           |      |      |      |      |      |      |      |      |      |      |      |      |
| Muller-A | ALMLII-----NTSVCTRS-----VFNNVNS-----RMGV*LVF-----SANESK-----                                                                   |      |      |      |      |      |      |      |      |      |      |      |      |
|          | 880                                                                                                                            | 890  | 900  | 910  | 920  | 930  | 940  | 950  | 960  | 970  | 980  | 990  |      |
| Helitron | NVDREIIEEEMANLPYTEKERLIRADPVCARYFD--YRREILKVMNRREGIFGENFVIKYWRVFGQRGSRPHLGHMFVKDAPAVLSTESISTVIAFNKHITVDVDSELAPYVEYQKH          |      |      |      |      |      |      |      |      |      |      |      |      |
| Muller-A | -----SIQEREKSIDPV-----EY*G/YNY--LQLL-----VLEYWA*ERCSG-----EFCIMVRYVN-----TKSE-----                                             |      |      |      |      |      |      |      |      |      |      |      |      |
|          | 1000                                                                                                                           | 1010 | 1020 | 1030 | 1040 | 1050 | 1060 | 1070 | 1080 | 1090 | 1100 | 1110 | 1120 |
| Helitron | RHKMCLCKKANKSGKVKCFRGIYPMPPTTEILSPLPEETPNLDFHQNFKKIQDLNDSQSSDMIDLHISFENFLSHEQVSLNYEDKYAISGSKKPHIFLKRFAEIVCNAYKNKHSIQMR         |      |      |      |      |      |      |      |      |      |      |      |      |
| Muller-A | --RRLSILR-----GSFE-----YLFK-----GV*PNNIL*MQR                                                                                   |      |      |      |      |      |      |      |      |      |      |      |      |
|          | 1130                                                                                                                           | 1140 | 1150 | 1160 | 1170 | 1180 | 1190 | 1200 | 1210 | 1220 | 1230 | 1240 |      |
| Helitron | AMNDIQYLDPYACCSYIINYNKTRQGISKLMREAAKEVGGNYTRQKLIHQHGFISGTEISAQEAIVCCVCLGIPLSGTSNKCQVNTFPPEQRVRLMKSITLQNMHQESTDIFVKGLLERY       |      |      |      |      |      |      |      |      |      |      |      |      |
| Muller-A | AMNDIQYLDPYACCSYIINYNKTRQGISKLMREAAKEVGGNYTRQKLIHQHGFISGTEISAQEAIVCCVCLGIPLSGTSNKCQVNTFPPEHRVRLMKSITLQNMHQESTDIFVKGLLERY       |      |      |      |      |      |      |      |      |      |      |      |      |
|          | 1250                                                                                                                           | 1260 | 1270 | 1280 | 1290 | 1300 | 1310 | 1320 | 1330 | 1340 | 1350 | 1360 | 1370 |
| Helitron | EQRPTELEGLCLADFAANYEFSKSGKRCQNRDDEEENEAEQVEVFIPLRDNBSGFIERETKPSILKMYRNFNI--NTRSNNYFRALAMLFPWRDEEKDLSVNCEDLYNNQHLVNSNFKFNAL     |      |      |      |      |      |      |      |      |      |      |      |      |
| Muller-A | EQRPTELEGLCLADFAANYEFFSAKRCQNRDDEEENEAEQVEVFIPLRDNBSGFIERETKPSILKY-----NTRSNNYFRALAMLFPWRDEEKDLSVNCEDLYNNQHLVNSNFKFNAL         |      |      |      |      |      |      |      |      |      |      |      |      |
|          | 1380                                                                                                                           | 1390 | 1400 | 1410 | 1420 | 1430 | 1440 | 1450 | 1460 | 1470 | 1480 | 1490 |      |
| Helitron | GDLEDALRRAMEEENREEGEEVDEAIEAEFRALAIPEISSQINVLNLDQAADQDRSIRLIK--LPPIVSLMILANLIRSLNLKQTYLTHVLHNVRNKAVFVFGGGVGVKSRTSITIFQT        |      |      |      |      |      |      |      |      |      |      |      |      |
| Muller-A | GDLEDALRRAMEEENREEGEEVDEAIEAEFRALAIPEISSQINVLNLDQAADQDRSIRLIK/LPPIVSLMILANLIRSLNLKQ-----LHNVNRKNVNFVFGGGVGVKSRTSITIFQT         |      |      |      |      |      |      |      |      |      |      |      |      |
|          | 1500                                                                                                                           | 1510 | 1520 | 1530 | 1540 | 1550 | 1560 | 1570 | 1580 | 1590 | 1600 | 1610 | 1620 |
| Helitron | ISQEFNRRPGSNPETVKVLLCAPTKAAGIGGATLHSMFSLPLNQSNHAFKQGLPDLNLTLSRFDLKLILIDEISMVGEKMFSLDMRLKQIFSRPSPFPGGISVIVFGDLRQLCPVGDWRMI      |      |      |      |      |      |      |      |      |      |      |      |      |
| Muller-A | ISQEFNRRPGSNPETVKVLLCAPTKAAGIGGATLHSMFSLPLNQSNHAFKQGLPDLNLTLSRFDLKLILIDEISMVGEKMFSLDMRLKQIFSRPSPFPGGISVIVFGDLRQLCPVGDWRMI      |      |      |      |      |      |      |      |      |      |      |      |      |
|          | 1630                                                                                                                           | 1640 | 1650 | 1660 | 1670 | 1680 | 1690 | 1700 | 1710 | 1720 | 1730 | 1740 |      |
| Helitron | FKSSSGAHNPYSIAVGSLLWDGFKFFELTEIMRQRDDOPFATALNMMASAVMTSEDIQLLRDRIVHGSEAPDAIHFLYSNSETDKYNKEKLSIMTAEYTSIALDSIKAHEHNPDKTKYLDV      |      |      |      |      |      |      |      |      |      |      |      |      |
| Muller-A | FKSSSGAHNPYSIAVGSLLWDGFKFFELTEIMRQRDDOPFATALNMMASAVMTSENIQLLRDRIVHGSEAPDAIHFLYSNSETDKYNKEKLSIMTAEYTSIALDSIKAHEHNPDKTKYLDV      |      |      |      |      |      |      |      |      |      |      |      |      |
|          | 1750                                                                                                                           | 1760 | 1770 | 1780 | 1790 | 1800 | 1810 | 1820 | 1830 | 1840 | 1850 | 1860 | 1870 |
| Helitron | KSFKTSNTQGLCTSLVLLKTTAKYMMTVNVDSDGLVNGATGVLQMDLSSNPELLMIHFLPESVGVNARSKRSHSNESSWTPVQKTSKFGYHQNEQVITDRKQFPFVAAEAITHKSOGATY       |      |      |      |      |      |      |      |      |      |      |      |      |
| Muller-A | KSFKTSNTQGLCTSLVLLKTTAKYMMTVNVDSDGLVNGATGVLQMDLSSNPELLMIHFLPESVGVNARSKRSHSNESSWTPVQKTSKFGYHQNEQVITDRKQFPFVAAEAITHKSOGATY       |      |      |      |      |      |      |      |      |      |      |      |      |
|          | 1880                                                                                                                           | 1890 | 1900 | 1910 | 1920 | 1930 | 1940 | 1950 | 1960 | 1970 | 1980 | 1990 |      |
| Helitron | SKVVVHTSSNMQRALYVACSRATSNAGLYIVGVLIPSRPKRDCPVAKEMENLRSAKLLHTHFDCLLNPSELNIFPHNKESLCHFDVCSQDQLMKSSILCFVEASTYSNEAYNIPGFSTAVRL     |      |      |      |      |      |      |      |      |      |      |      |      |
| Muller-A | SKVVVHTSSNMQRALYVACSRATSNAGLYIVGVLIPSRPKRDCPVAKEMENLRSAKLLHTHFDCLLNPSELNIFPHNKESLCHFDVCSQDQLMKSSILCFVEASTYSNEAYNIPGFSTAVRL     |      |      |      |      |      |      |      |      |      |      |      |      |
|          | 2000                                                                                                                           | 2010 | 2020 | 2030 | 2040 | 2050 |      |      |      |      |      |      |      |
| Helitron | DCQSVASGARPKRGILIFVRNELLNHCSSIIIESNRYADSGNLASPVFYEALFKYKS                                                                      |      |      |      |      |      |      |      |      |      |      |      |      |
| Muller-A | DCQSVASGARPKRGILIFVRNELLNHCSSIIIESNRYADSGNLASPVFYEALFKYKS                                                                      |      |      |      |      |      |      |      |      |      |      |      |      |

B

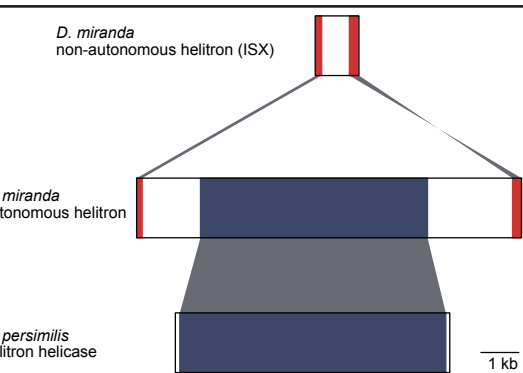

Supplement: NIHMS608338-supplement-Figure_S3.pdf [file NIHMS608338-supplement-Figure_S3.pdf]
