# Supplementary material
Source: PubMed Central journal article supplement (PMC4086361)
Supplement: NIHMS608338-supplement-Figure_S4.pdf [file NIHMS608338-supplement-Figure_S4.pdf]

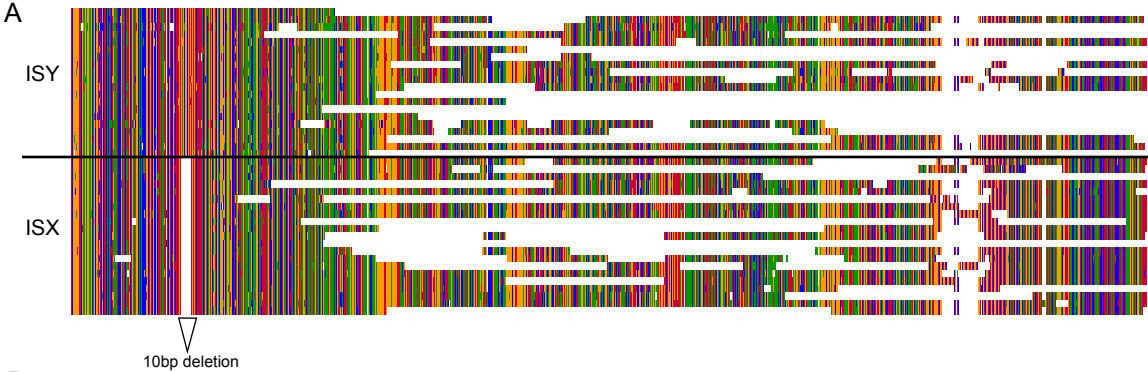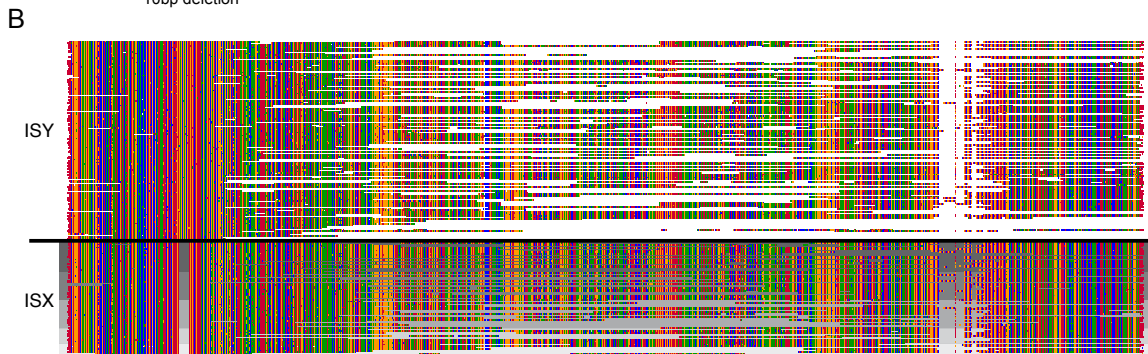

- strict CES (<500bp from peak summit)
- strict CES (>500bp from peak summit)
- broad CES (<500bp from peak summit)
- broad CES (>500bp from peak summit)
- not in CES
