# Supplementary material
Source: PubMed Central journal article supplement (PMC4086361)

A

unique MRE

conserved MRE

Dmir vs Dpse MRE % identity

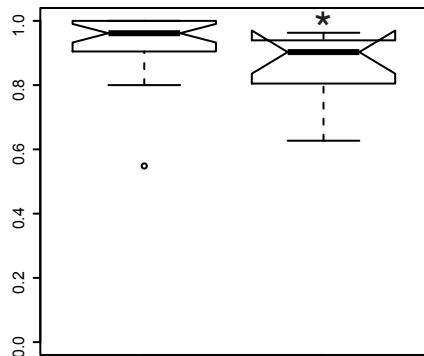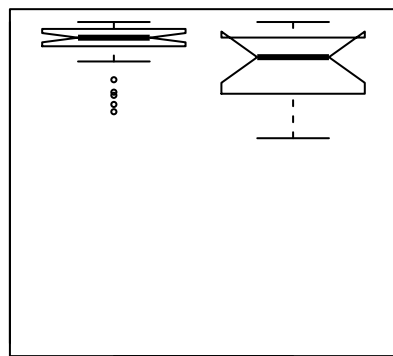

B

 $-\log_{10}(\text{FIMO MRE homology p-value})$ 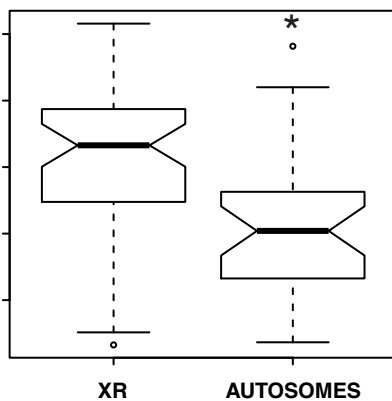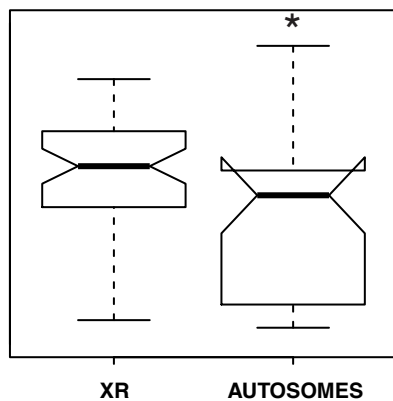

C

ChIP-seq MSL3 Fold-enrichment

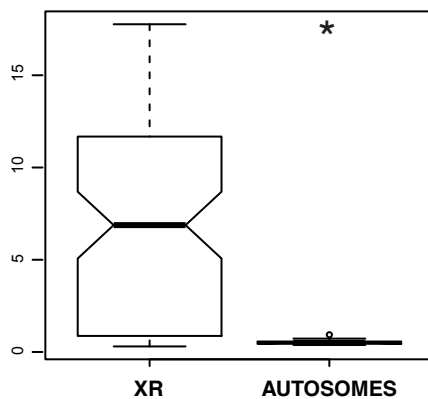

Supplement: NIHMS608338-supplement-Figure_S16.pdf [file NIHMS608338-supplement-Figure_S16.pdf]
