# Supplementary material
Source: PubMed Central journal article supplement (PMC4086361)

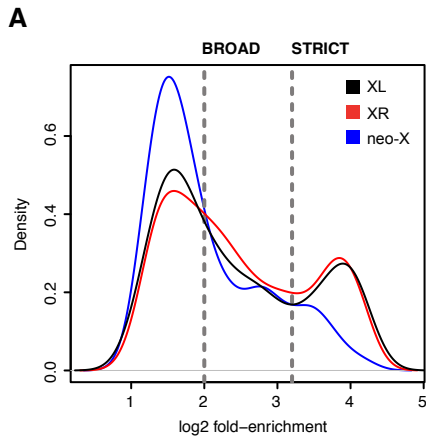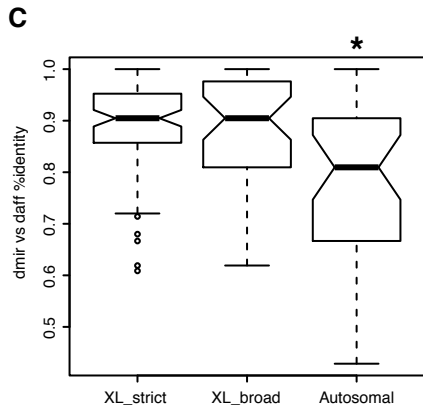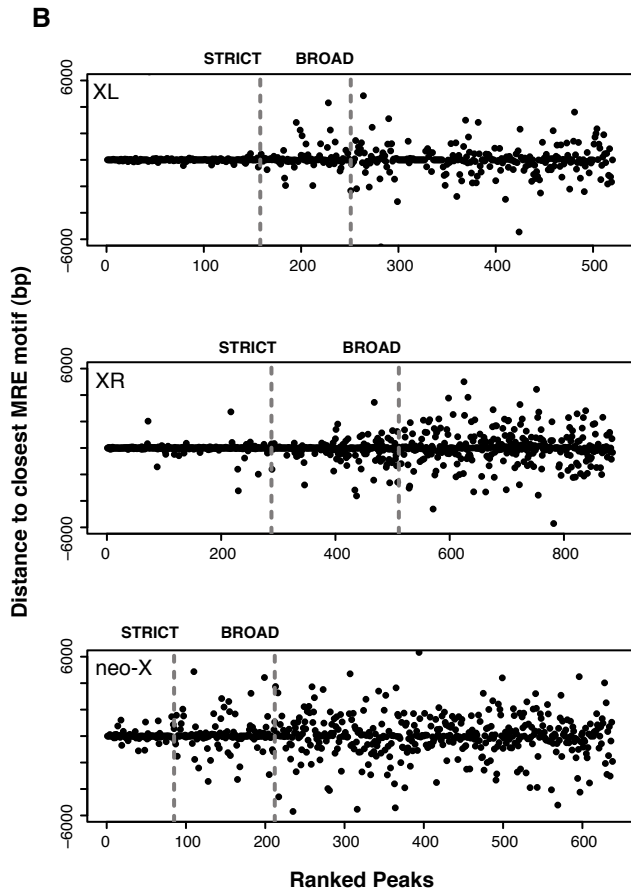

Supplement: NIHMS608338-supplement-Figure_S1.pdf [file NIHMS608338-supplement-Figure_S1.pdf]

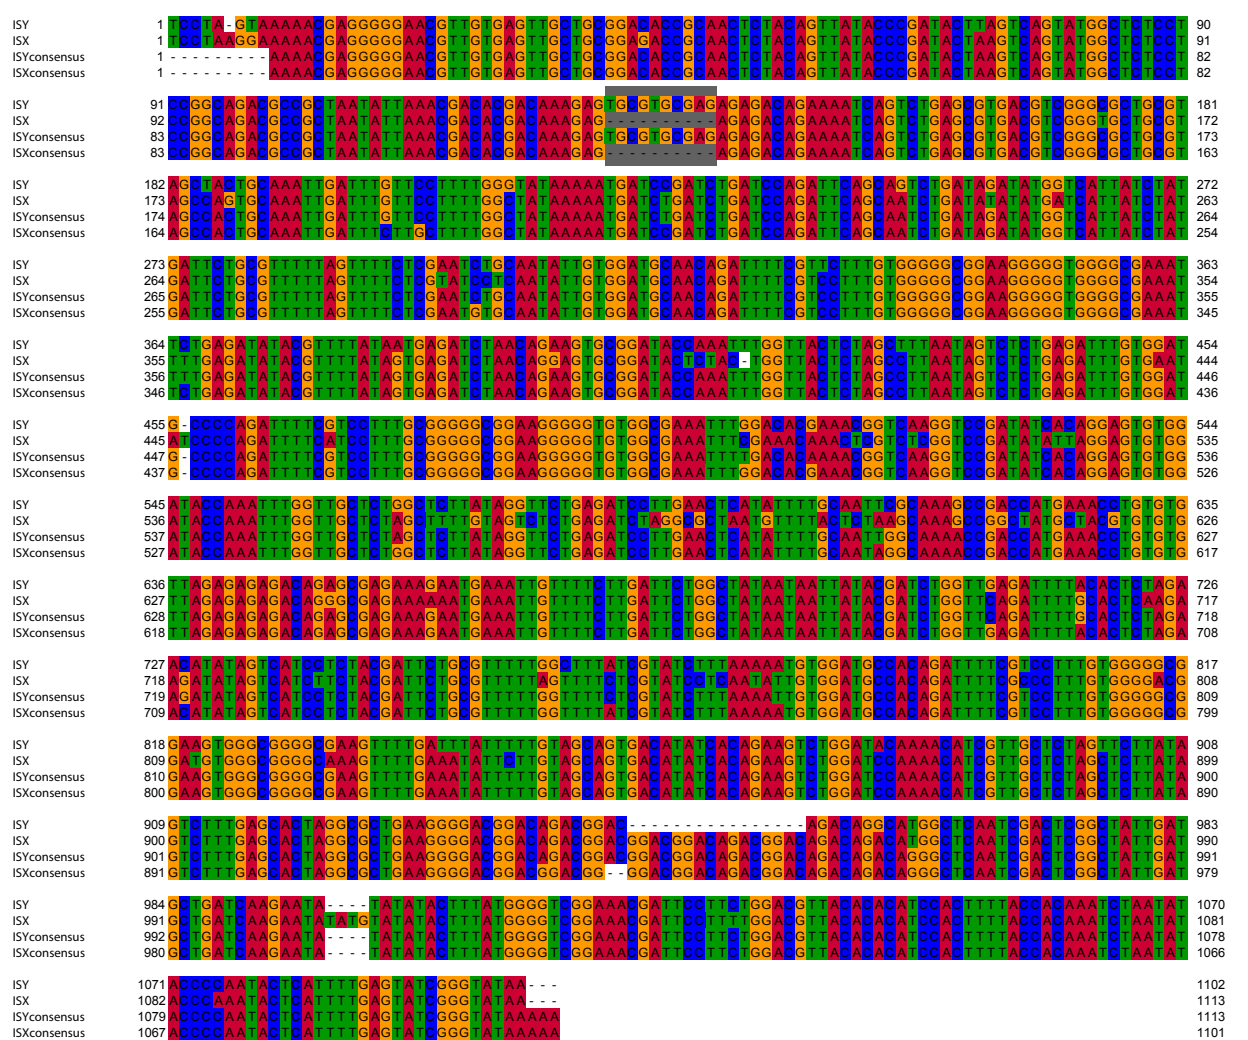

Supplement: NIHMS608338-supplement-Figure_S10.pdf [file NIHMS608338-supplement-Figure_S10.pdf]

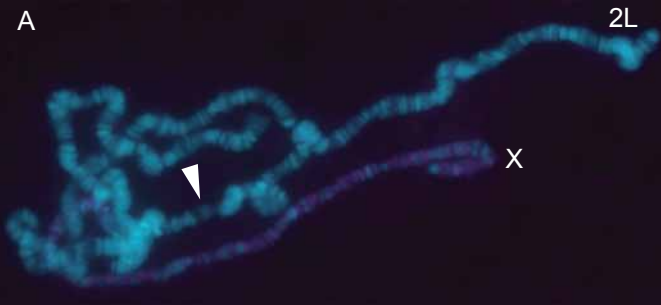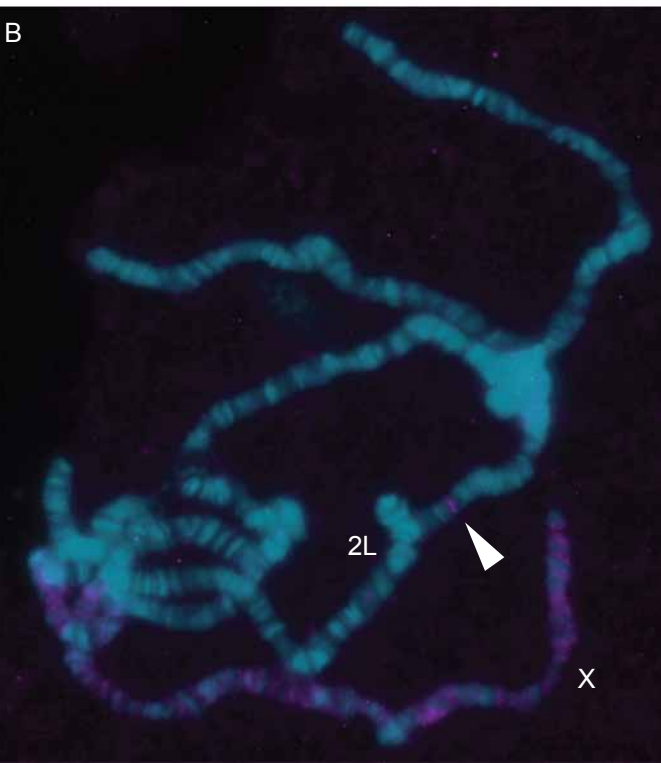

Supplement: NIHMS608338-supplement-Figure_S11.pdf [file NIHMS608338-supplement-Figure_S11.pdf]

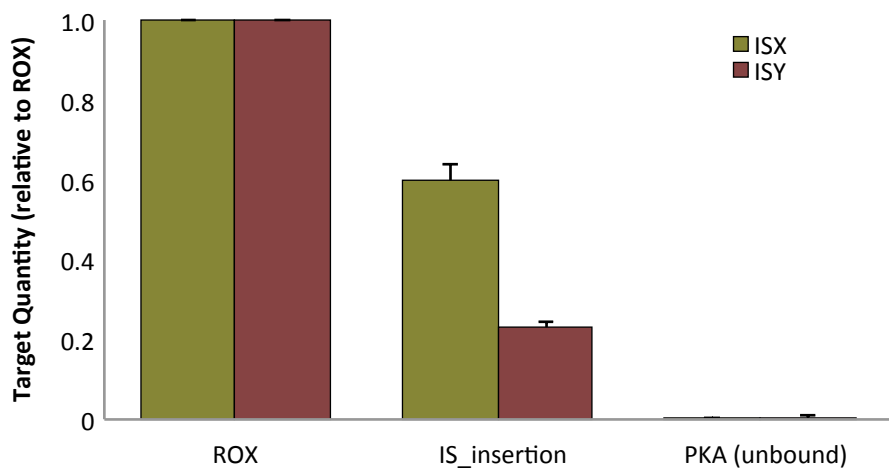

Supplement: NIHMS608338-supplement-Figure_S12.pdf [file NIHMS608338-supplement-Figure_S12.pdf]

ISX-> ISY

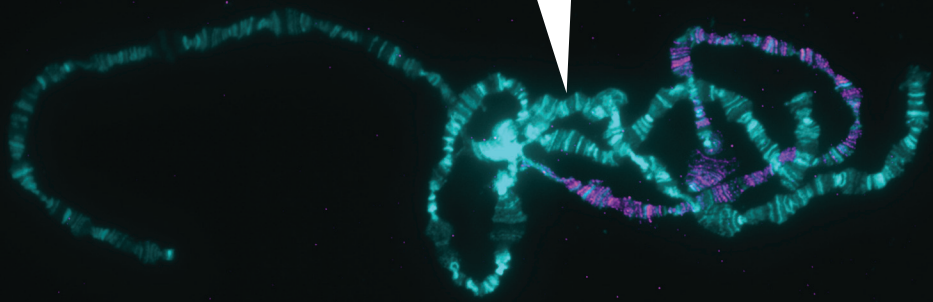

ISY-> ISX

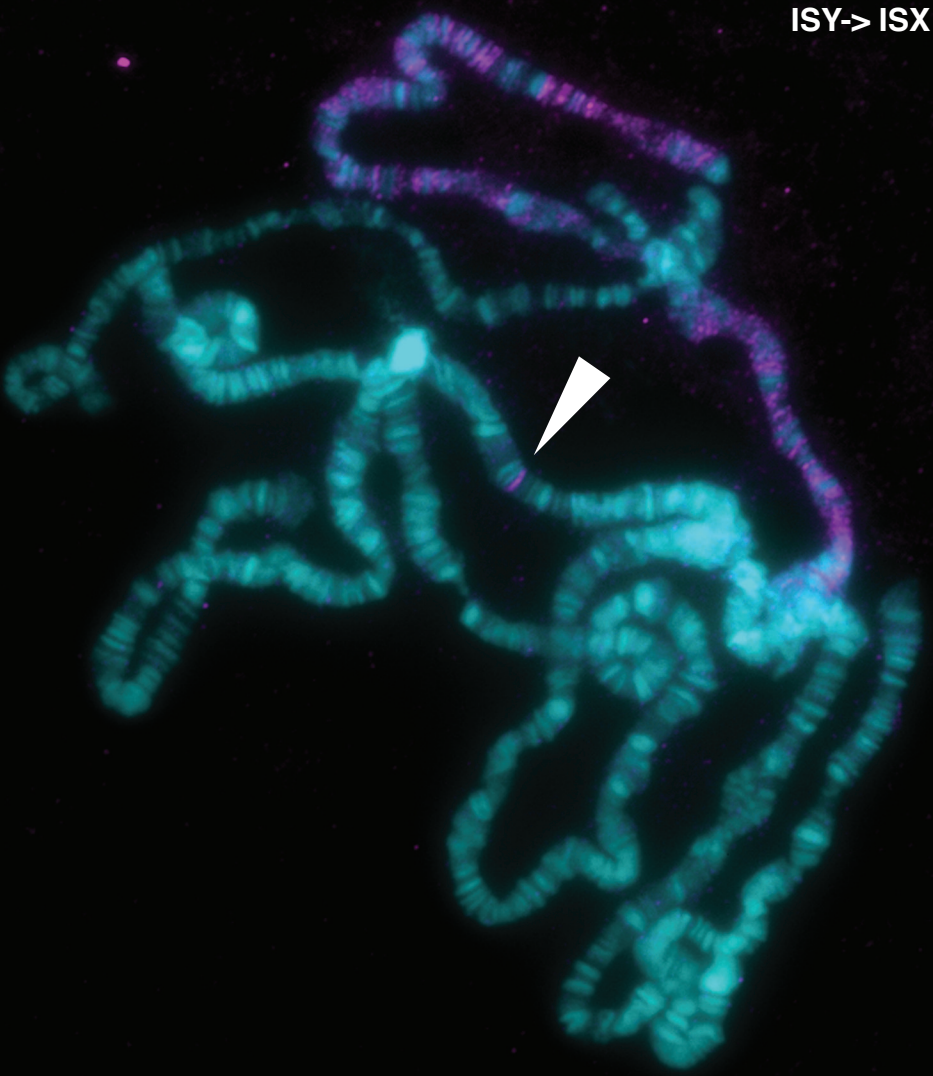

Supplement: NIHMS608338-supplement-Figure_S13.pdf [file NIHMS608338-supplement-Figure_S13.pdf]

**A**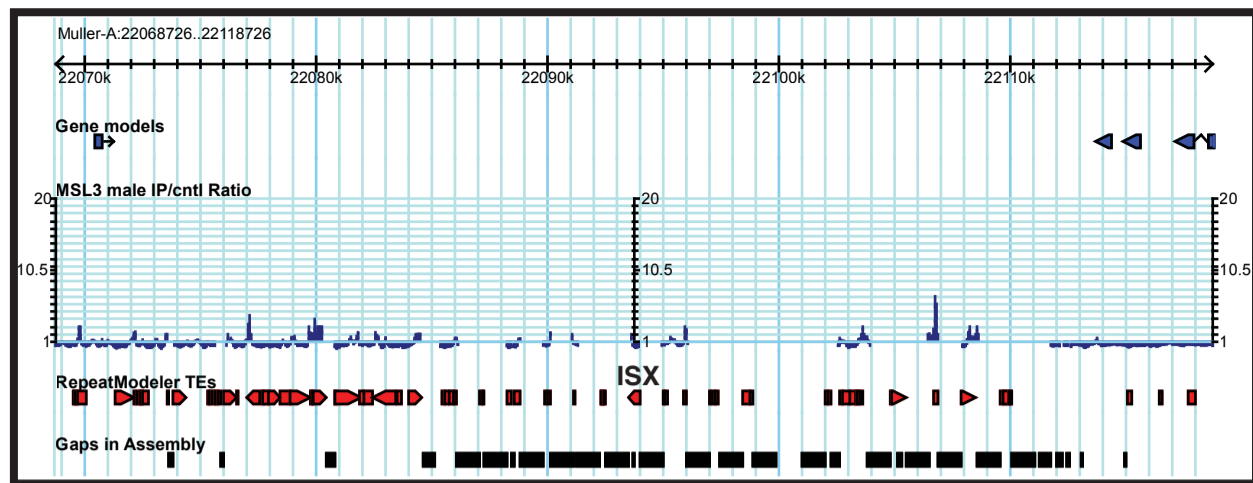**B**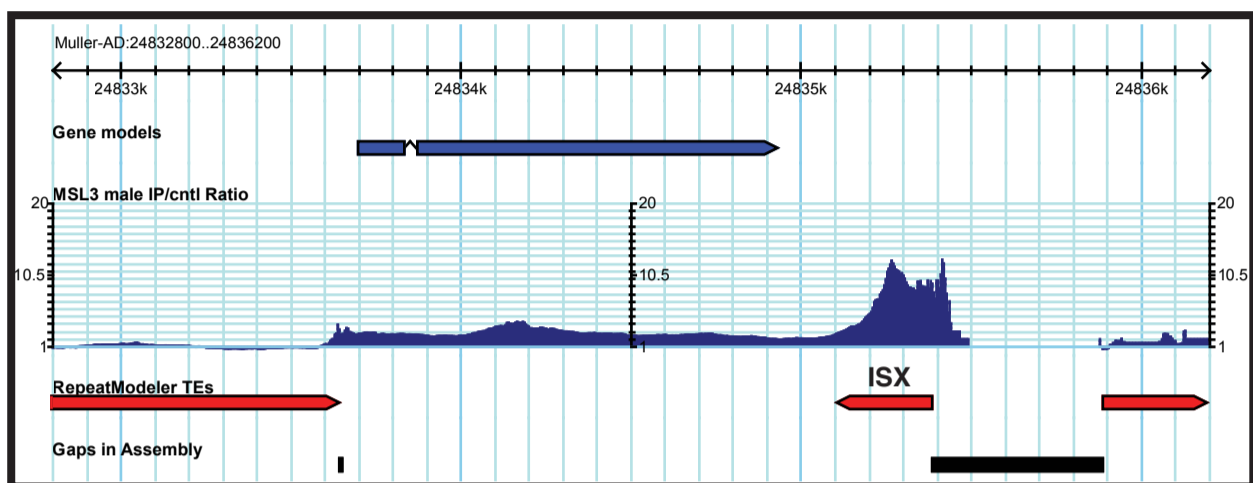**C**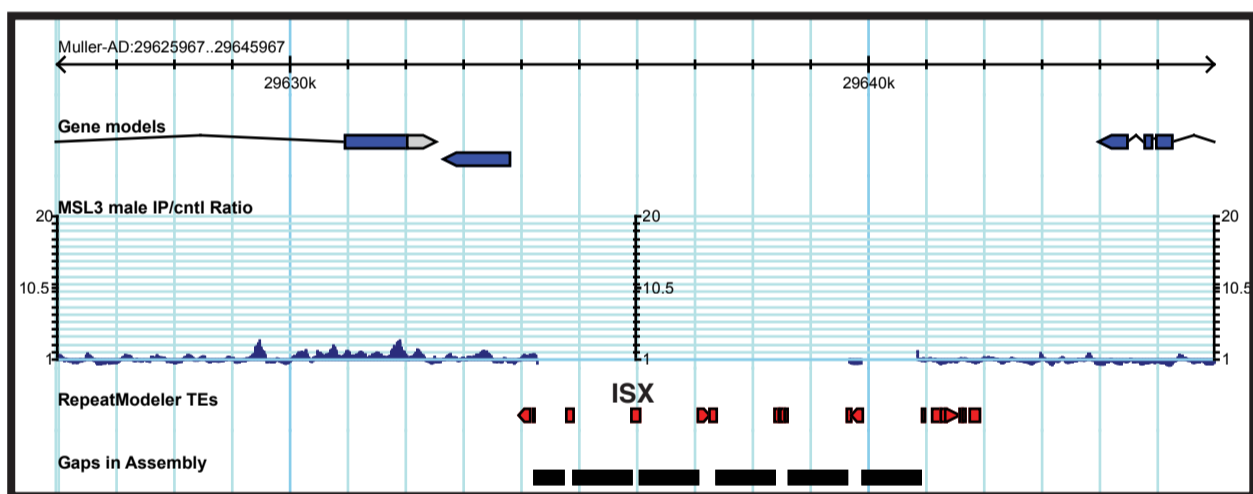**D**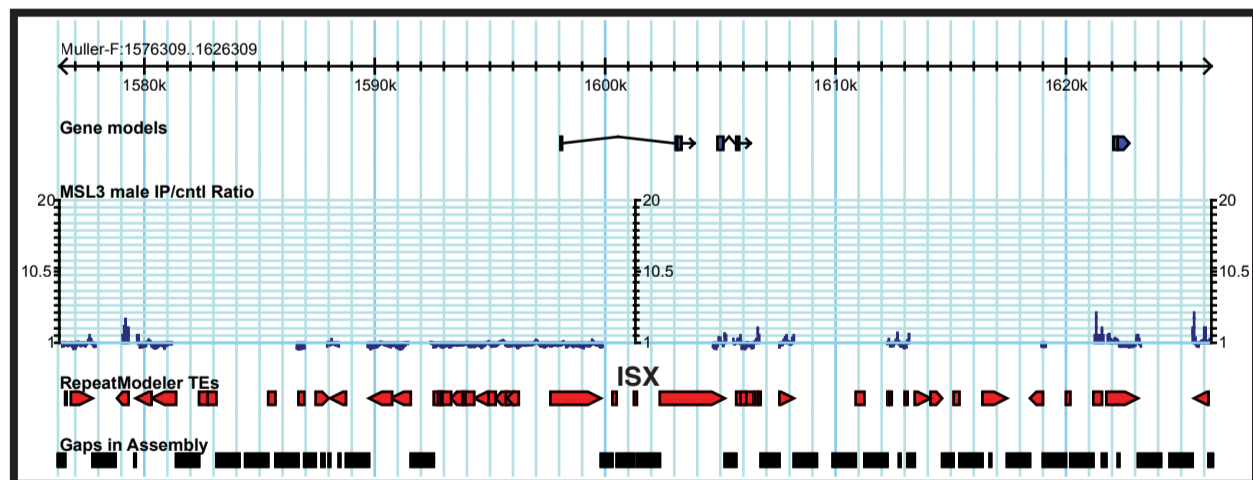**E**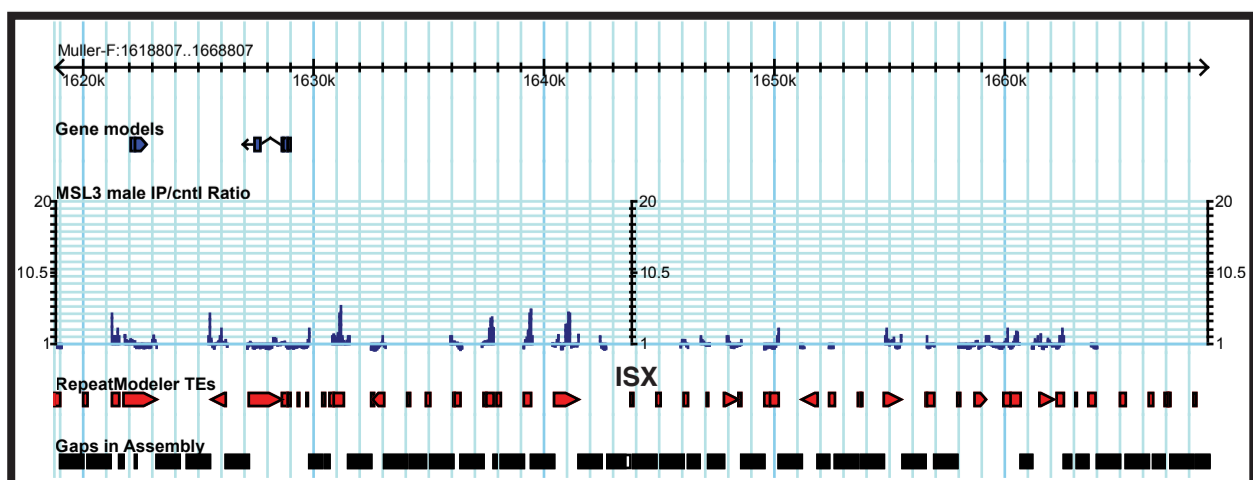

Supplement: NIHMS608338-supplement-Figure_S14.pdf [file NIHMS608338-supplement-Figure_S14.pdf]

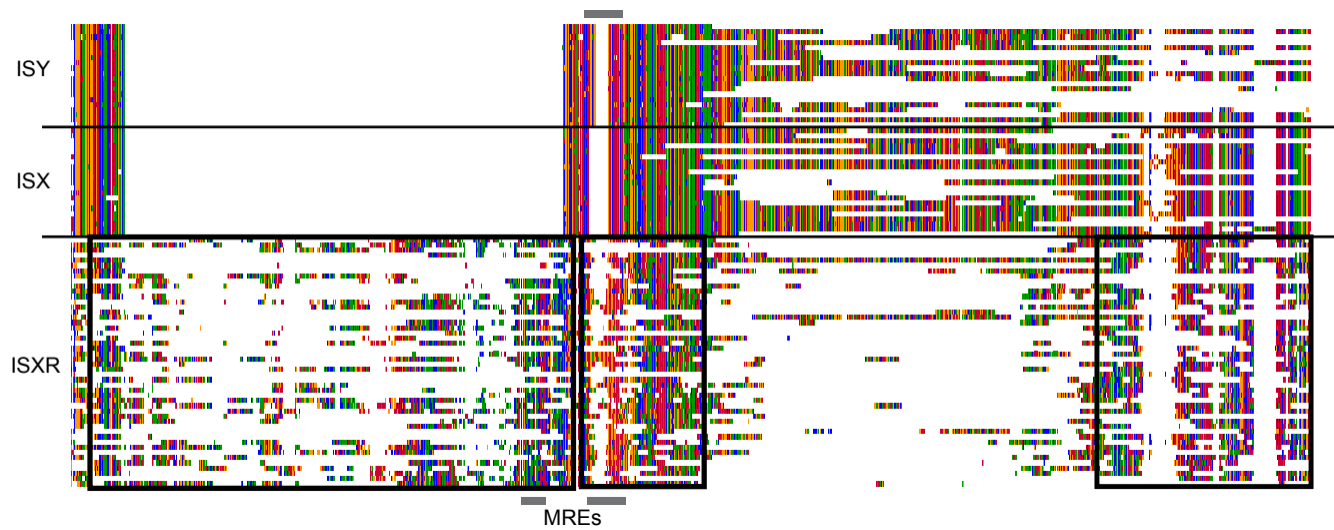

Supplement: NIHMS608338-supplement-Figure_S15.pdf [file NIHMS608338-supplement-Figure_S15.pdf]

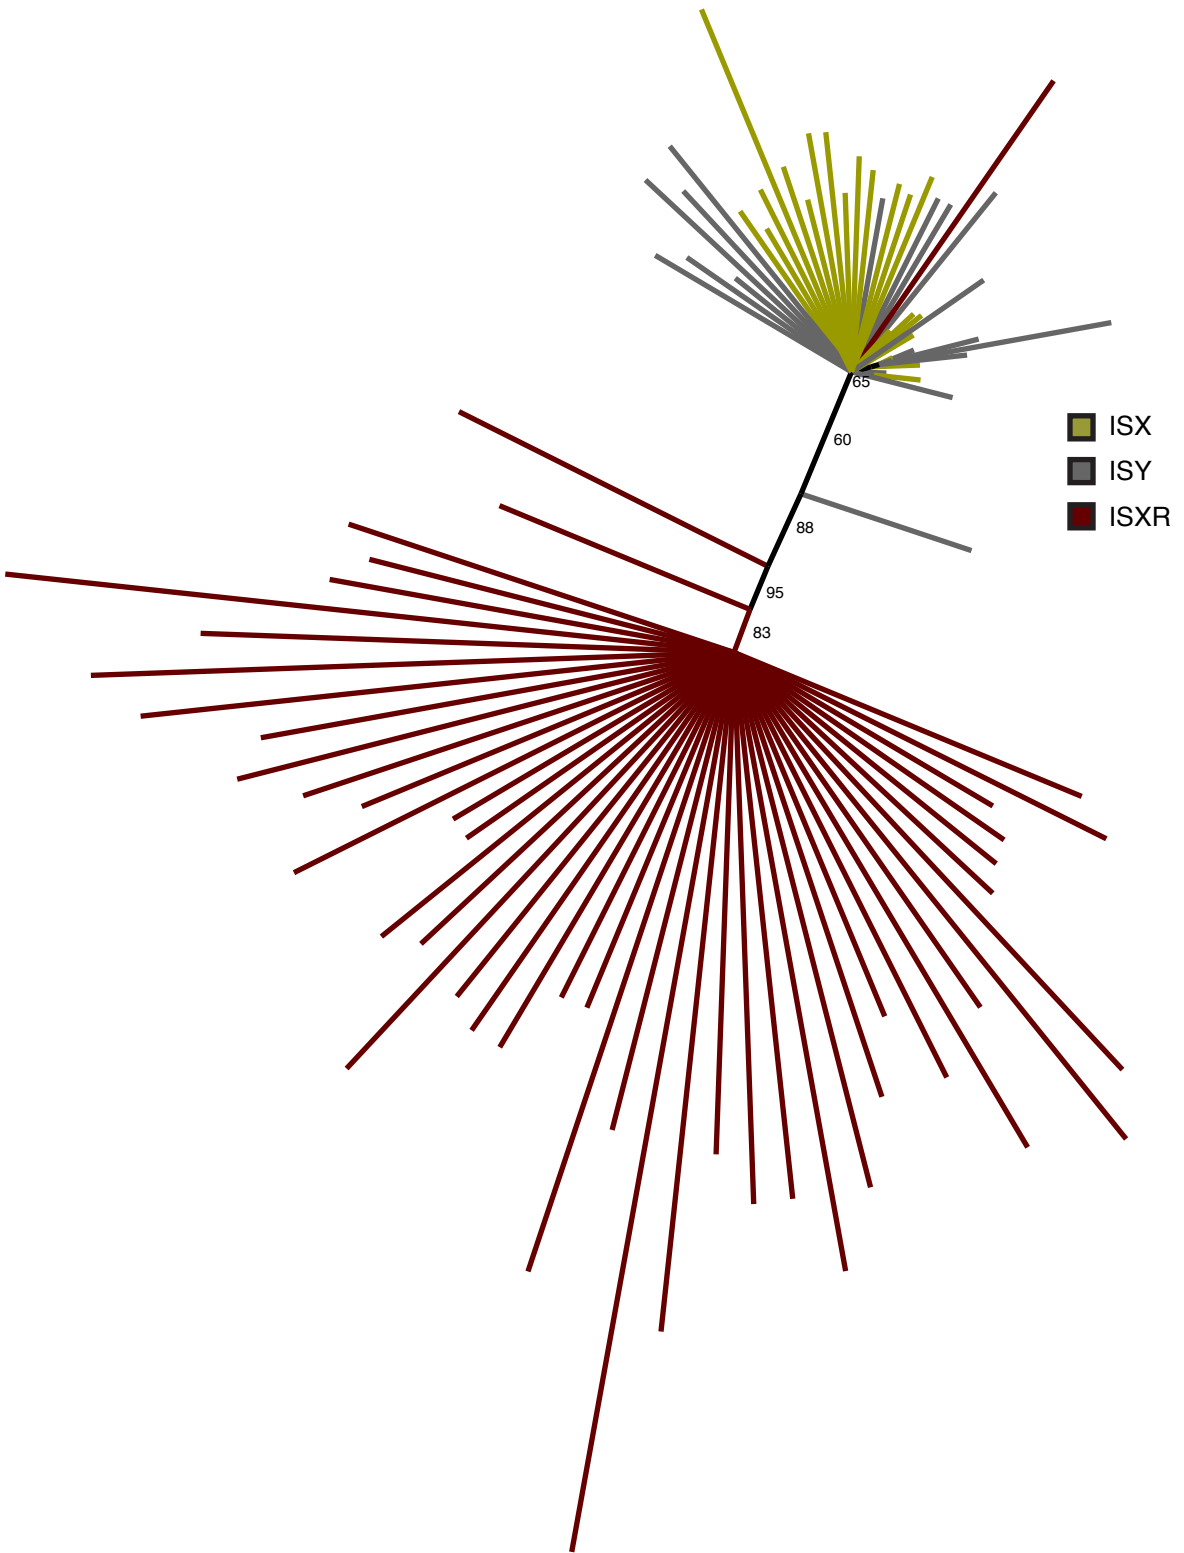

- ISX
- ISY
- ISXR

0.07

Supplement: NIHMS608338-supplement-Figure_S18.pdf [file NIHMS608338-supplement-Figure_S18.pdf]

**A**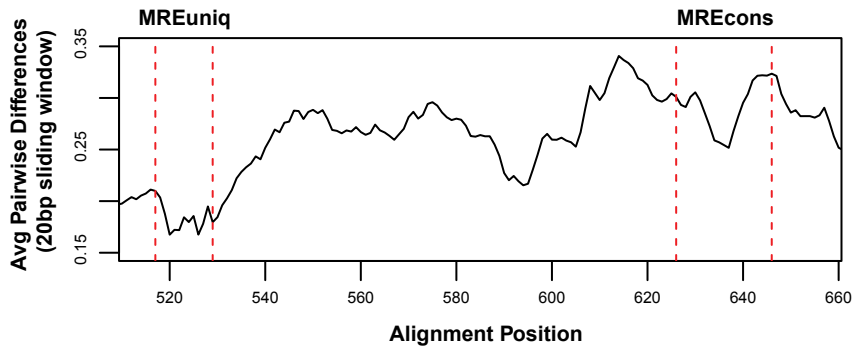**B**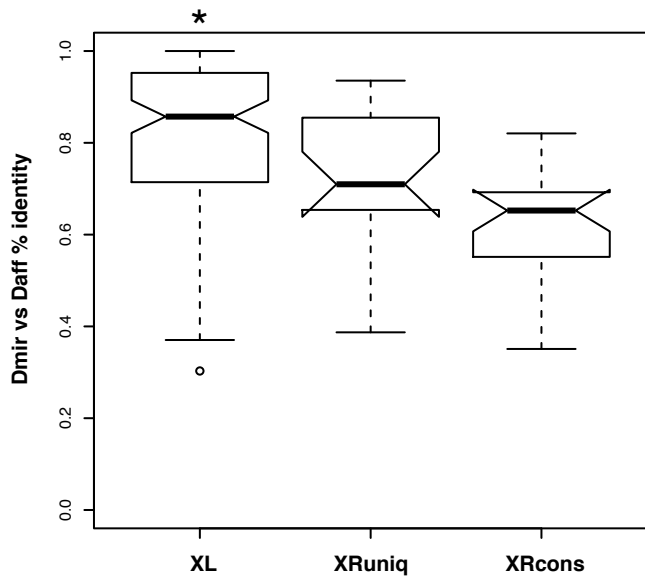

Supplement: NIHMS608338-supplement-Figure_S20.pdf [file NIHMS608338-supplement-Figure_S20.pdf]

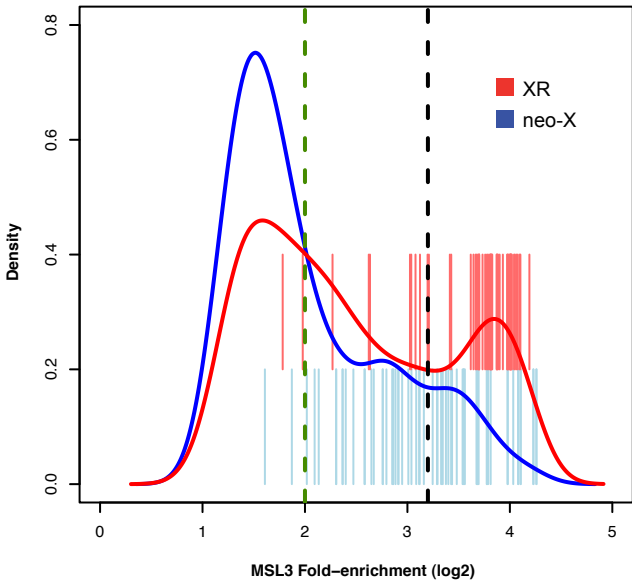

Supplement: NIHMS608338-supplement-Figure_S5.pdf [file NIHMS608338-supplement-Figure_S5.pdf]

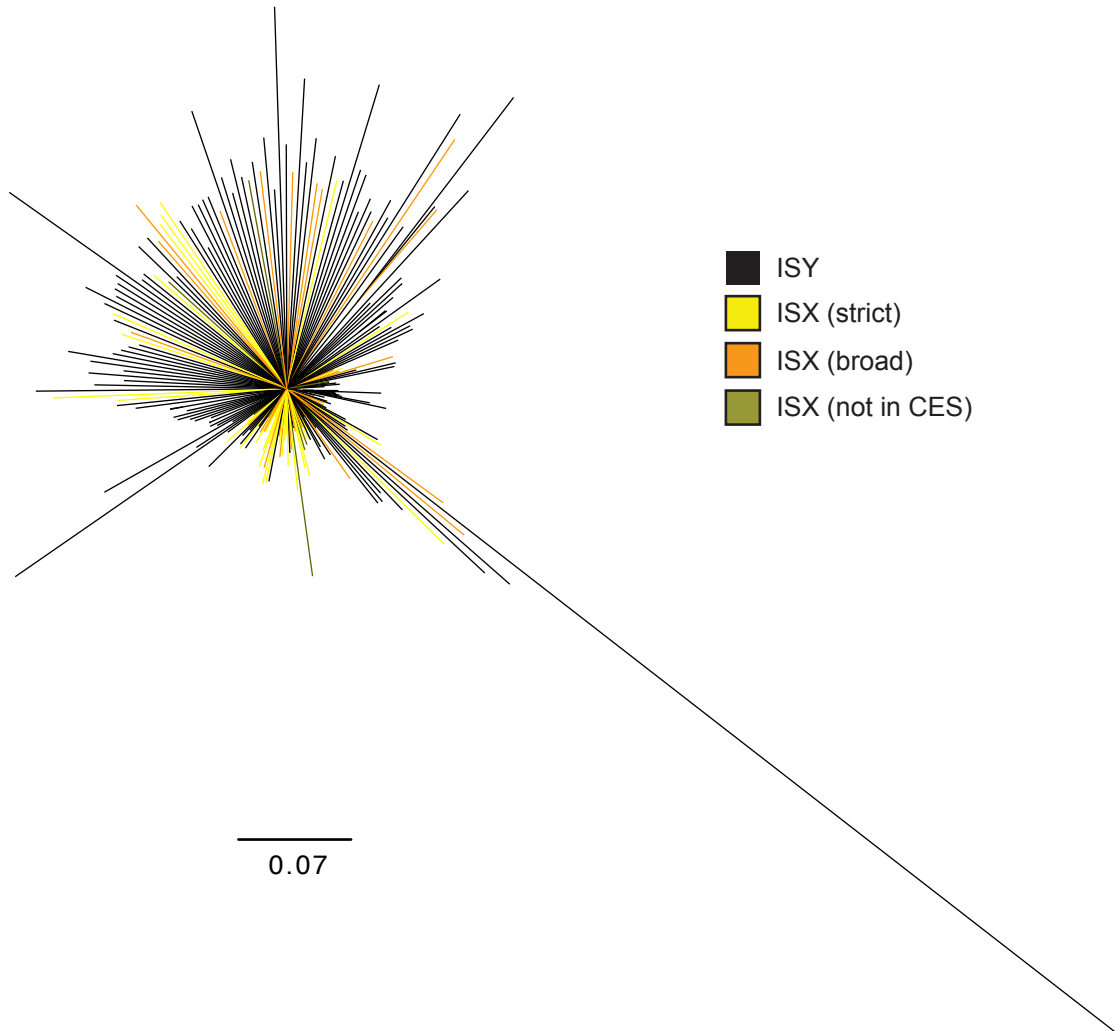

Supplement: NIHMS608338-supplement-Figure_S6.pdf [file NIHMS608338-supplement-Figure_S6.pdf]

Female/Male normalized read coverage

1.5  
1.0  
0.5  
0.0

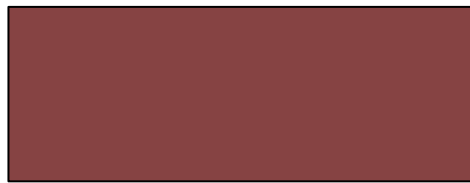

ISY

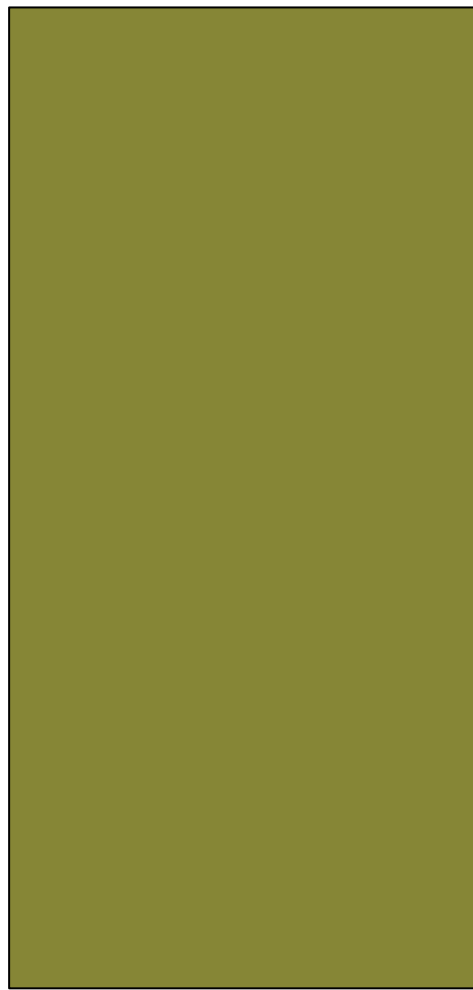

ISX

Supplement: NIHMS608338-supplement-Figure_S7.pdf [file NIHMS608338-supplement-Figure_S7.pdf]

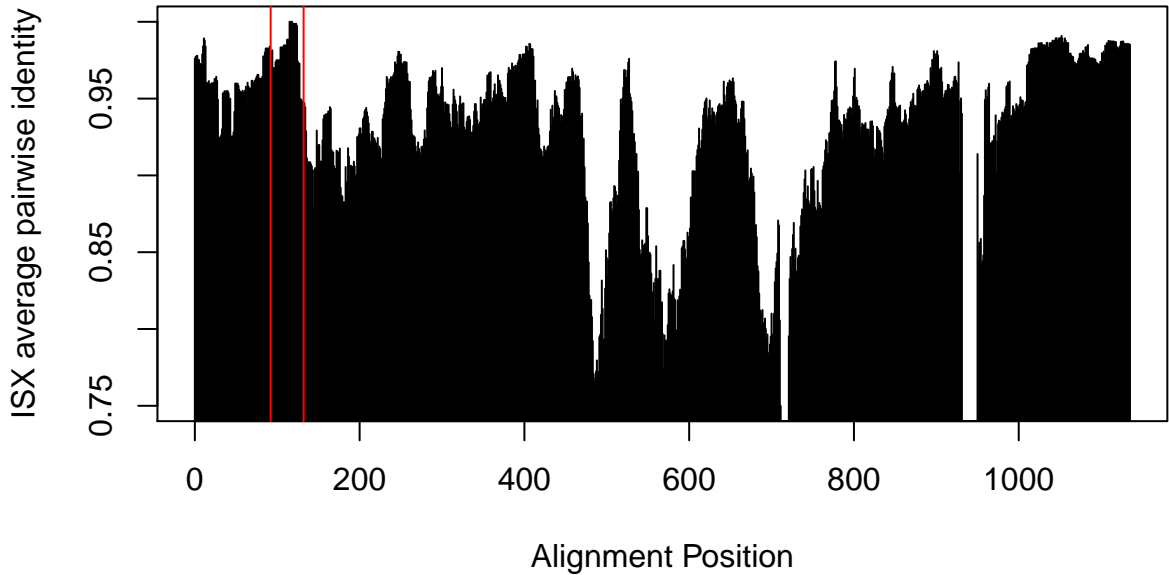

Supplement: NIHMS608338-supplement-Figure_S8.pdf [file NIHMS608338-supplement-Figure_S8.pdf]

5' END

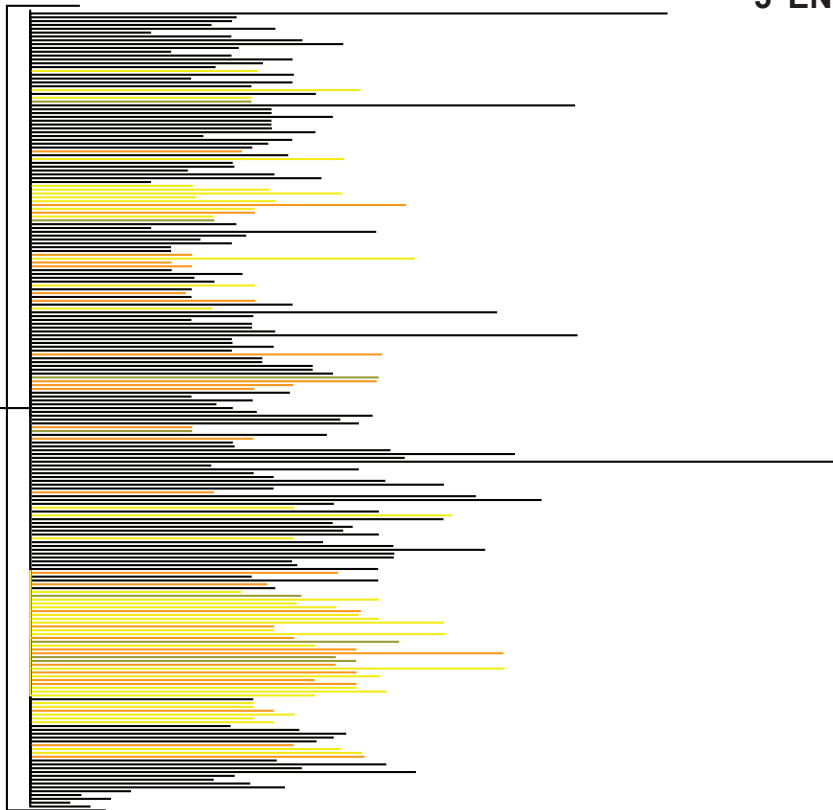

3' END

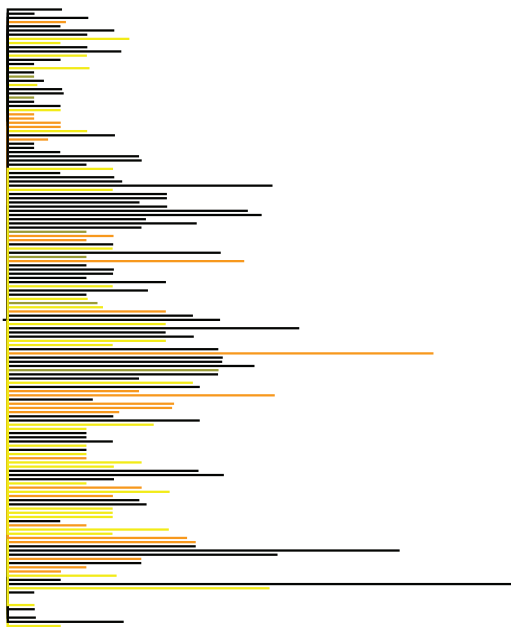

- ISY
- ISX (strict)
- ISX (broad)
- ISX (not in CES)

0.02

5' END

3' END

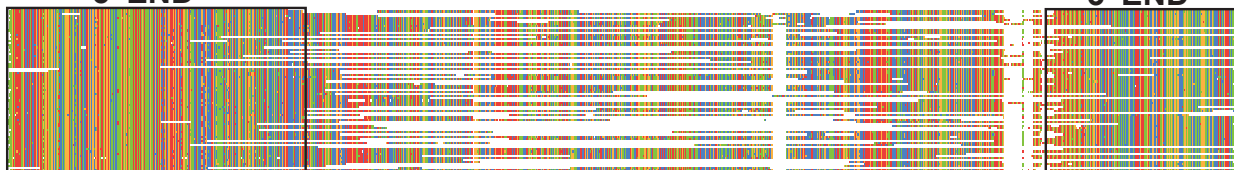

Supplement: NIHMS608338-supplement-Figure_S9.pdf [file NIHMS608338-supplement-Figure_S9.pdf]
